# Supplementary material for: Rapid and Sensitive Electrochemical Assay of Cefditoren with MWCNT/Chitosan NCs/Fe2O3 as a Nanosensor
Source: MDPI journal article supplement (doi:10.3390/mi13081348), 2022-08-19
Supplement: s1 [file s1]

# Rapid and Sensitive Electrochemical Assay of Cefditoren with MWCNT/Chitosan NCs/Fe<sub>2</sub>O<sub>3</sub> as a Nanosensor

Nida Aydogdu <sup>1,2</sup>, Goksu Ozcelikay <sup>2</sup>, Sibel A. Ozkan <sup>2,\*</sup>

<sup>1</sup> Department of Analytical Chemistry, Faculty of Pharmacy, Afyonkarahisar Health Sciences University, 03218 Afyonkarahisar, Turkey

<sup>2</sup> Department of Analytical Chemistry, Faculty of Pharmacy, Ankara University, 06560 Ankara, Turkey

\* Correspondence: sibel.ozkan@pharmacy.ankara.edu.tr

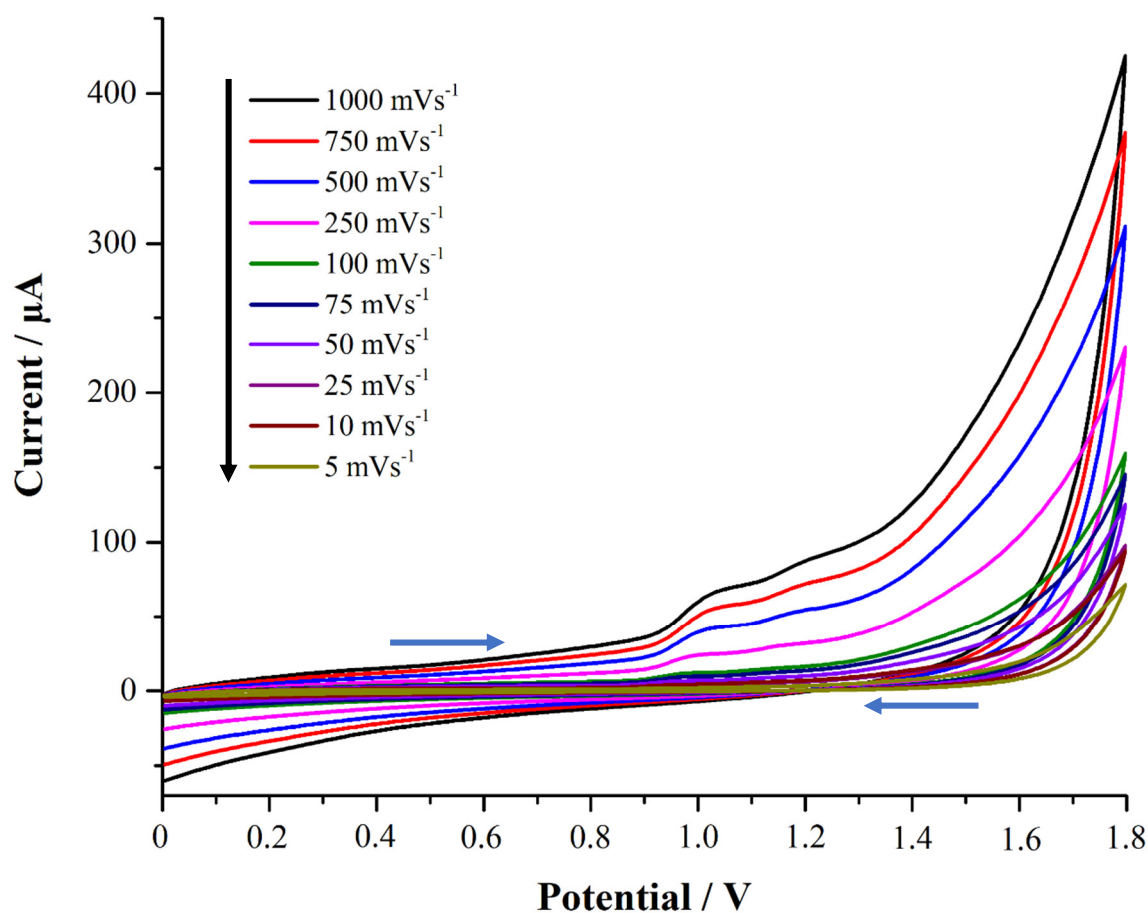

**Figure S1.** Cyclic voltammograms of different scan rates of  $1 \times 10^{-4}$  M CFT solutions in 0.1 M H<sub>2</sub>SO<sub>4</sub> by MWCNT/Chitosan NCs/Fe<sub>2</sub>O<sub>3</sub>/GCE (CV parameters: 0.2 V potential condition, 5 s time condition, 5 s equilibration time, 0.0 V potential begin, 0.005 V potential step)

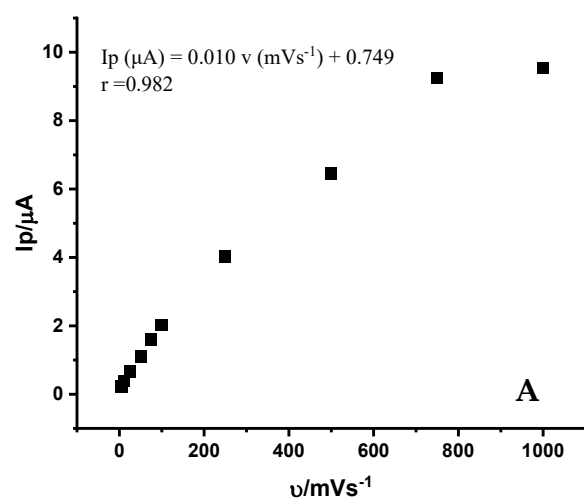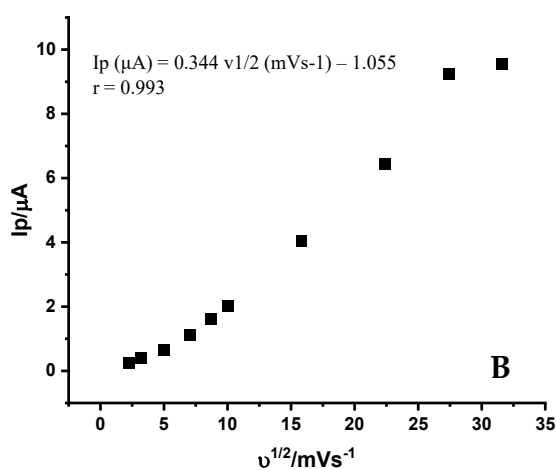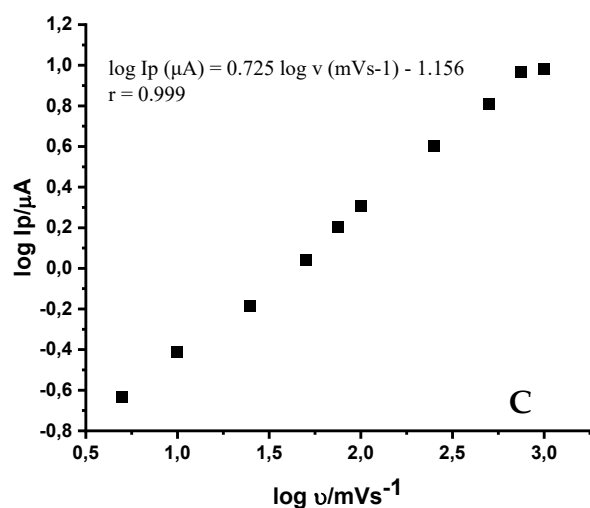

**Figure S2.** The graphs of  $1 \times 10^{-4}$  M CFT solutions in 0.1 M  $H_2SO_4$  by nanosensor (A)  $i_p$ -  $v$  (B)  $i_p$ - $v^{1/2}$  (C)  $\log v$ - $\log i_p$
